# Supplementary material for: Wave Equation Numerical Simulation and RTM With Mixed Staggered-Grid Finite-Difference Schemes
Source: Frontiers journal article supplement (doi:10.3389/feart.2022.873541), 2022-07-12
Supplement: Data_Sheet_1.docx [file Data_Sheet_1.docx]

**Appendix**

The acoustic wave equation can be discretized with M-SFD(*N*=2), and here we only list one of the three FD discrete acoustic equations

Where are the FD coefficients. And the analytical expression of them is given by

Here we list one of the three FD discrete acoustic equations given by M-SFD(*N*=3)

Where are the FD coefficients. And the analytical expression of them is given by

Here we list one of the three FD discrete acoustic equations given by M-SFD(N=4)

Where are the FD coefficients. And the analytical expression of them is given by

The above analytical expression of the FD coefficients can also be used in the FD discrete elastic wave equations given by M-SFD(*N*=2,3,4), and just need to substitute with or .
